# Supplementary material for: Ligand binding remodels protein side-chain conformational heterogeneity
Source: eLife. 2022 Mar 21;11:e74114. doi: 10.7554/eLife.74114 (PMC9084896; doi:10.7554/eLife.74114)
Supplement: Supplementary file 4. [file elife-74114-supp4.xlsx]

## Sheet: Sheet1
PDB	Resolution
135l	1.3
193l	1.33
1azf	1.8
1dpx	1.65
1hew	1.75
1hsx	1.9
1iee	0.94
1jis	1.9
1jj3	1.9
1ljg	1.9
1ljn	1.19
1lzb	1.5
1lzc	1.8
1lzd	1.8
1lze	1.8
2htx	1.56
2hu1	1.63
3ems	1.65
3iju	1.6
3rt5	1.75
3wl2	0.96
4lfp	1.72
4wm2	1.6
4xen	1.55
6pbb	1.89
1lee	0.94
1jse	1.12
1lks	1.1
3lzt	0.92
2vb1	0.65
2nwd	1.04
