# Supplementary material for: Ligand binding remodels protein side-chain conformational heterogeneity
Source: eLife. 2022 Mar 21;11:e74114. doi: 10.7554/eLife.74114 (PMC9084896; doi:10.7554/eLife.74114)
Supplement: Supplementary file 5. [file elife-74114-supp5.csv]

residue	Xray_difference	apo	holo	NMR_difference
2	-0.01611858014	0.598	0.570	-0.028
8	-0.1876816389	0.803	0.658	-0.145
9	-0.07733111901	1.000	0.962	-0.038
10	-0.0202718258	0.901	0.931	0.03
11	-0.09958065473	0.861	1.000	0.139
12	-0.1959354989	0.812	0.932	0.12
17	0.01450835276	0.632	0.580	-0.075
25	-0.09455399754	1.000	0.870	-0.13
29	-0.216570149	0.871	0.840	-0.031
31	-0.086302706	0.984	0.941	-0.043
43	-0.1347492757	0.361	0.394	0.033
47	-0.2152897796	0.327	0.300	-0.027
51	-0.09636204456	0.778	0.927	0.149
55	0.04324701005	0.323	0.393	0.261
56	0.1029121421	0.734	0.816	0.082
58	-0.01002739278	1.000	1.000	0.134
69	-0.1133968987	0.984	0.702	-0.282
75	-0.08589132837	0.588	0.744	0.156
78	0.2164526979	0.810	0.831	0.021
82	0.2047355758	0.880	0.868	-0.012
83	0.1213246875	0.783	1.000	0.217
84	-0.09061698933	0.879	0.778	-0.101
88	-0.0454027827	0.722	0.655	-0.067
89	0.1065321335	1.000	1.000	0
90	0.2125909684	0.919	1.000	0.081
92	-0.1266748474	0.707	0.705	-0.002
95	-0.1236245079	0.680	0.904	0.224
98	0.06151481079	0.740	0.610	-0.13
99	-0.2906754575	0.487	0.210	-0.277
105	0.2393579799	0.630	1.000	0.37
107	0.0925165473	0.832	1.000	0.168
109	0.1692489757	0.354	0.201	-0.153
120	0.08182483408	0.660	0.736	0.076
122	0.2793791795	0.879	0.831	-0.048
124	-0.03337034279	0.753	0.731	-0.022
129	0.1093245425	0.525	0.615	0.09
